# Supplementary material for: COVID-19 Epidemic in Bangladesh among Rural and Urban Residents: An Online Cross-Sectional Survey of Knowledge, Attitudes, and Practices
Source: Epidemiologia (Basel). 2020 Dec 22;2(1):1–13. doi: 10.3390/epidemiologia2010001 (PMC9620879; doi:10.3390/epidemiologia2010001)
Supplement: Supplementary file 1 [file epidemiologia-02-00001-s001.pdf]

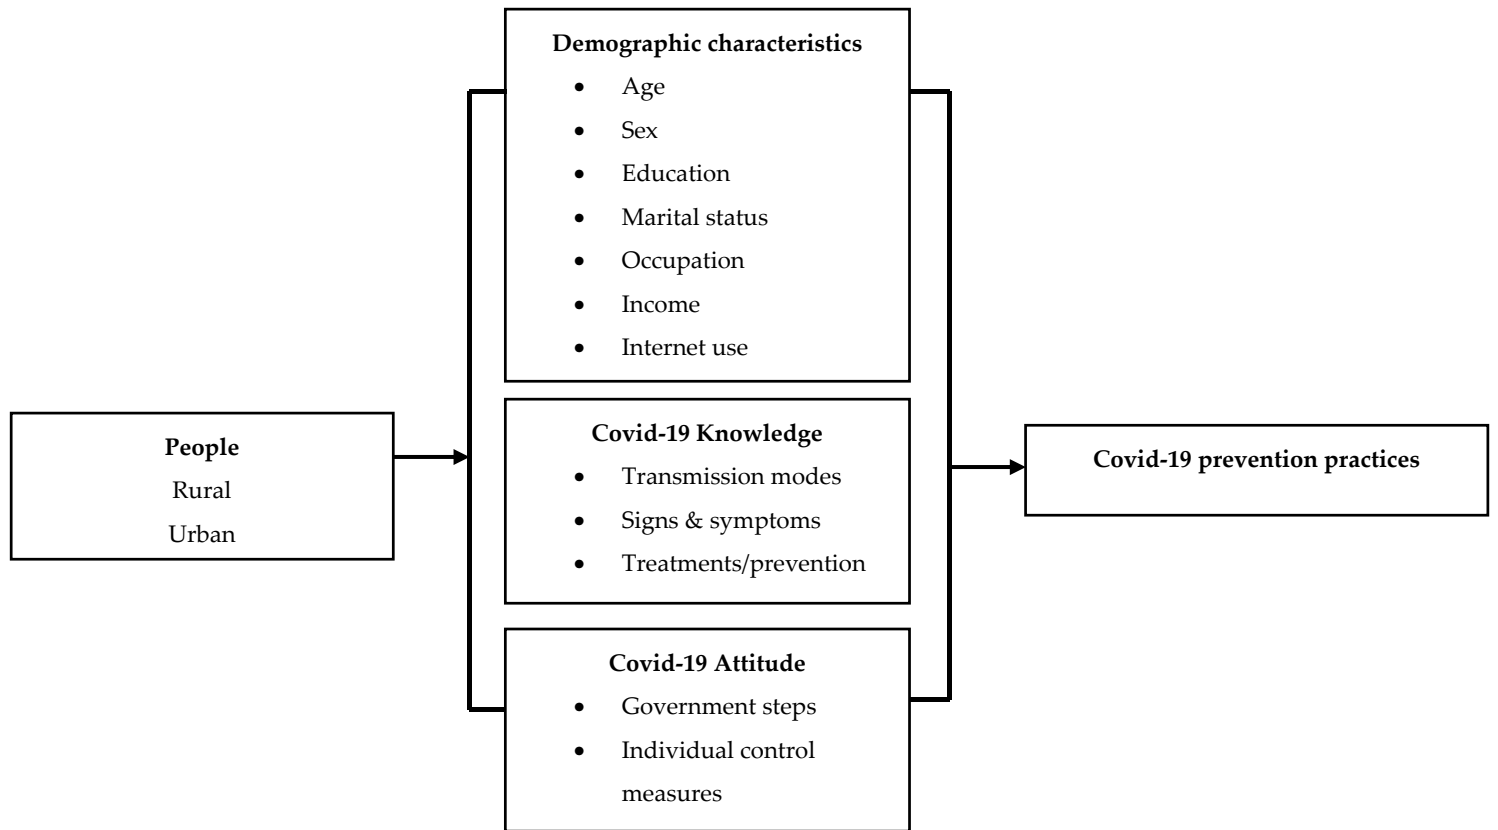

**Figure S1.** Study framework

**Table S1.** Cronbach's alpha value estimation.

| KAP Items                 | Reliability  |
|---------------------------|--------------|
| <b>Knowledge (K1-K20)</b> | <b>0.743</b> |
| k1                        | 0.728        |
| k2                        | 0.733        |
| k3                        | 0.718        |
| k4                        | 0.728        |
| k5                        | 0.732        |
| k6                        | 0.721        |
| k7                        | 0.740        |
| k8                        | 0.726        |
| k9                        | 0.730        |
| k10                       | 0.725        |
| k11                       | 0.723        |
| k12                       | 0.730        |
| k13                       | 0.717        |
| k14                       | 0.728        |
| k15                       | 0.768        |
| k16                       | 0.791        |
| k17                       | 0.738        |
| k19                       | 0.734        |
| k20                       | 0.747        |
| <b>Attitude (A1-A4)</b>   | <b>0.660</b> |
| A1                        | 0.618        |
| A2                        | 0.597        |
| A3                        | 0.552        |
| A4                        | 0.605        |
| <b>Practice (P1-12)</b>   | <b>0.560</b> |
| P1                        | 0.552        |
| P2                        | 0.529        |
| P3                        | 0.518        |
| P4                        | 0.517        |
| P5                        | 0.520        |
| P6                        | 0.502        |
| P7                        | 0.506        |
| P8                        | 0.591        |
| P9                        | 0.566        |
| P10                       | 0.569        |
| P11                       | 0.560        |
| P12                       | 0.617        |
| <b>Total</b>              | <b>0.703</b> |

**Table S2.** Analysis of demographic factors, knowledge and attitudes associated with preventive practices of COVID-19 in Bangladesh.

| Variables                                       | N    | n (%)       | Poor practices |         |
|-------------------------------------------------|------|-------------|----------------|---------|
|                                                 |      |             | OR (95 % C.I)  | P value |
| Age group (years)                               |      |             |                |         |
| <30                                             | 725  | 491 (67.7)  | Reference      |         |
| 30-40                                           | 419  | 300 (71.7)  | 1.2 (0.9-1.6)  | 0.172   |
| >40                                             | 376  | 331 (88.0)  | 3.5 (2.5-4.9)  | <0.01   |
| Sex                                             |      |             |                |         |
| Female                                          | 575  | 385 (67.0)  | Reference      |         |
| Male                                            | 945  | 737 (78.0)  | 1.7 (1.4-2.2)  | <0.01   |
| Education                                       |      |             |                |         |
| > higher secondary                              | 1162 | 796 (68.5)  | Reference      |         |
| ≤ higher secondary                              | 358  | 326 (91.1)  | 4.7 (3.2-6.9)  | <0.01   |
| Family Income (Monthly)                         |      |             |                |         |
| >30000                                          | 487  | 314 (64.5)  | Reference      |         |
| 20000-30000                                     | 342  | 252 (73.7)  | 1.5 (1.1-2.1)  | <0.01   |
| 10000-20000                                     | 351  | 281 (80.1)  | 2.2 (1.6-3.04) | <0.01   |
| <10000                                          | 340  | 275 (80.9)  | 2.3 (1.7-3.3)  | <0.01   |
| Place of residence                              |      |             |                |         |
| Urban                                           | 609  | 411 (67.5)  | Reference      |         |
| Rural                                           | 911  | 711 (78.0)  | 1.7 (1.3-2.2)  | <0.01   |
| Use internet to know about COVID-19             |      |             |                |         |
| Yes                                             | 1356 | 978 (72.1)  | Reference      |         |
| No                                              | 164  | 144 (87.8)  | 2.8 (1.7-4.5)  | <0.01   |
| Use television/radio to know about COVID-19     |      |             |                |         |
| Yes                                             | 989  | 750 (66.80) | Reference      | <0.05   |
| No                                              | 531  | 372 (33.2)  | 0.7 (0.6-0.9)  |         |
| Read newspaper/magazines to know about COVID-19 |      |             |                |         |
| Yes                                             | 609  | 406 (36.2)  | Reference      |         |
| No                                              | 911  | 716 (63.8)  | 1.8 (1.5-2.3)  | <0.01   |
| Use social media to know about COVID-19         |      |             |                |         |
| Yes                                             | 1148 | 787 (68.6)  | Reference      |         |
| No                                              | 372  | 335 (90.1)  | 4.1 (2.9-5.9)  | <0.01   |
| Knowledge of signs & symptoms                   |      |             |                |         |
| Good                                            | 292  | 165 (56.5)  | Reference      |         |
| Poor                                            | 1228 | 957 (77.9)  | 2.7 (2-3.5)    | <0.01   |
| Knowledge of transmissions                      |      |             |                |         |
| Good                                            | 666  | 403 (60.5)  | Reference      |         |
| Poor                                            | 854  | 719 (84.2)  | 3.5 (2.7-4.4)  | <0.01   |
| Attitudes                                       |      |             |                |         |
| Good                                            | 1200 | 856 (71.3)  | Reference      |         |
| Poor                                            | 320  | 266 (83.1)  | 1.9 (1.4-2.7)  | <0.01   |

Scores considered (≥80 = good and <80 = poor). OR odds ratio

**Table S3.** Multivariable logistic regression analysis with forward conditional method showing predictors of preventive practices of COVID-19 in Bangladesh.

| variables                                                              | Poor practices |             |                |         |
|------------------------------------------------------------------------|----------------|-------------|----------------|---------|
|                                                                        | N              | n (%)       | aOR (95 % C.I) | P value |
| Sex                                                                    |                |             |                |         |
| Female                                                                 | 575            | 385 (67.0)  | Reference      |         |
| Male                                                                   | 945            | 737 (78.0)  | 1.9 (1.5-2.4)  | <0.01   |
| Education                                                              |                |             |                |         |
| > higher secondary                                                     | 1162           | 796 (68.5)  | Reference      |         |
| ≤ higher secondary                                                     | 358            | 326 (91.1)  | 3.8 (2.6-5.6)  | <0.01   |
| Knowledge of transmissions                                             |                |             |                |         |
| Good                                                                   | 666            | 403 (60.5)  | Reference      |         |
| Poor                                                                   | 854            | 719 (84.2)  | 3.5 (2.7-4.4)  | <0.01   |
| Knowledge of signs & symptoms                                          |                |             |                |         |
| Good                                                                   | 292            | 165 (56.5)  | Reference      |         |
| Poor                                                                   | 1228           | 957 (77.9)  | 1.6 (1.2-2.2)  | <0.01   |
| Use television/radio to know about COVID-19                            |                |             |                |         |
| Yes                                                                    | 989            | 750 (66.80) | Reference      |         |
| No                                                                     | 531            | 372 (33.2)  | 0.7 (0.5-0.9)  | <0.05   |
| Read newspaper/magazines to know about COVID-19                        |                |             |                |         |
| Yes                                                                    | 609            | 406 (36.2)  | Reference      |         |
| No                                                                     | 911            | 716 (63.8)  | 1.6 (1.2-2)    | <0.01   |
| Use social media to know about COVID-19                                |                |             |                |         |
| Yes                                                                    | 1148           | 787 (68.6)  | Reference      |         |
| No                                                                     | 372            | 335 (90.1)  | 1.9 (1.2-2.9)  | <0.01   |
| aOR adjusted odds ratio. Scores considered (≥80 = good and <80 = poor) |                |             |                |         |
